# Supplementary material
Source: PubMed Central journal article supplement (PMC3002179)
Supplement: Supp_Data.pdf [file Supp_Data.pdf]

## SUPPLEMENTARY DATA

| Supplementary Table S1. Summary of Pharmacological Parameters from Automated Planar Patch Clamp, TI <sup>+</sup> Flux, and [ <sup>3</sup> H]Dofetilide Binding Assays |                                                    |                             |             |                       |                      |             |                  |                 |
|-----------------------------------------------------------------------------------------------------------------------------------------------------------------------|----------------------------------------------------|-----------------------------|-------------|-----------------------|----------------------|-------------|------------------|-----------------|
| Drugs                                                                                                                                                                 | [ <sup>3</sup> H]Dofetilide<br>K <sub>i</sub> (μM) | TI <sup>+</sup> Flux Assays |             | APPC Assays           |                      |             | APPC Over (Fold) |                 |
|                                                                                                                                                                       |                                                    | EC <sub>50</sub> (μM)       | Hill Slope  | EC <sub>50</sub> (μM) | E <sub>max</sub> (%) | Hill Slope  | <sup>3</sup> H   | TI <sup>+</sup> |
| Amantadine                                                                                                                                                            | 10.47                                              | NI                          | NA          | 41.69                 | 55.4 ± 8.0           | 1           | 0.3              | NA              |
| Amiodarone                                                                                                                                                            | 0.59                                               | 2.75                        | 1           | 1.07                  | ~ 100.0              | 0.80 ± 0.07 | 0.6              | 2.6             |
| Amitriptyline                                                                                                                                                         | 8.91                                               | 28.18                       | 1.39 ± 0.17 | 1.35                  | ~ 100.0              | 1.11 ± 0.08 | 6.6              | 20.9            |
| Aripiprazole                                                                                                                                                          | 1.02                                               | 8.13                        | 1.72 ± 0.18 | 0.24                  | 84.0 ± 15.3          | 1           | 4.3              | 33.9            |
| <b>Asetmizole</b>                                                                                                                                                     | 0.003                                              | 2.09                        | 2.21 ± 0.13 | 0.02                  | 95.3 ± 5.7           | 1           | 0.2              | 97.7            |
| Bepidil                                                                                                                                                               | 0.51                                               | 4.37                        | 2.61 ± 0.41 | 0.39                  | ~ 100.0              | 1           | 1.3              | 11.2            |
| Chlorpheniramine                                                                                                                                                      | 5.50                                               | 14.79                       | 1.42 ± 0.17 | 2.14                  | 98.4 ± 5.0           | 1           | 2.6              | 6.9             |
| Chlorpromazine                                                                                                                                                        | 2.09                                               | 6.61                        | 1.70 ± 0.14 | 2.14                  | ~ 100.0              | 1           | 1.0              | 3.1             |
| Ciclopirox                                                                                                                                                            | 16.98                                              | 93.33 <sup>a</sup>          | 1           | 263                   | ~ 100.0              | 1           | 0.1              | 0.4             |
| <b>Cisapride</b>                                                                                                                                                      | 0.039                                              | 0.34                        | 1           | 0.02                  | ~ 100.0              | 1           | 1.9              | 16.6            |
| Clomipramine                                                                                                                                                          | 3.02                                               | 14.13                       | 2.14 ± 0.16 | 1.00                  | ~ 100.0              | 1           | 3.0              | 14.1            |
| Clozapine                                                                                                                                                             | 3.47                                               | 11.75                       | 1.19 ± 0.10 | 0.81                  | ~ 100.0              | 1           | 4.3              | 14.5            |
| Clozapine-N-oxide                                                                                                                                                     | 9.33                                               | NI                          | NA          | NI                    | NA                   | NA          | NA               | NA              |
| <b>Dofetilide</b>                                                                                                                                                     | 0.004                                              | 0.23                        | 1           | 0.02                  | ~ 100.0              | 1.00        | 0.2              | 12.9            |
| Doxepin                                                                                                                                                               | 8.32                                               | 21.38                       | 1.22 ± 0.12 | 2.14                  | 96.1 ± 5.8           | 1.00        | 3.9              | 10.0            |
| Droperidol                                                                                                                                                            | 0.29                                               | 0.47                        | 1           | 0.05                  | 95.4 ± 5.9           | 1           | 6.3              | 10.2            |
| E-4031                                                                                                                                                                | 0.022                                              | 0.19                        | 1.42 ± 0.13 | 0.03                  | ~ 100.0              | 1.80 ± 0.41 | 0.8              | 7.1             |
| Fluoxetine                                                                                                                                                            | 4.27                                               | 7.14                        | 1.55 ± 0.17 | 0.36                  | ~ 100.0              | 1           | 11.8             | 20.0            |
| Fluvoxamine                                                                                                                                                           | 7.59                                               | 19.05                       | 1.52 ± 0.18 | 3.16                  | ~ 100.0              | 1           | 2.4              | 6.0             |
| <b>Grepafloxacin</b>                                                                                                                                                  | 16.63                                              | NI                          | NA          | NI                    | NA                   | NA          | NA               | NA              |
| Haloperidol                                                                                                                                                           | 0.10                                               | 0.27                        | 0.86 ± 0.03 | 0.03                  | 98.9 ± 3.9           | 1           | 3.3              | 8.5             |
| Imipramine                                                                                                                                                            | 3.47                                               | 31.62                       | 1.53 ± 0.16 | 0.51                  | ~ 100.0              | 0.64 ± 0.12 | 6.8              | 61.7            |
| <b>LAAM</b>                                                                                                                                                           | 3.24                                               | 5.75                        | 1.45 ± 0.11 | 0.72                  | 98.4 ± 7.7           | 1           | 4.5              | 7.9             |
| Lidoflazine                                                                                                                                                           | 0.060                                              | 3.02                        | 2.11 ± 0.30 | 0.10                  | ~ 100.0              | 1           | 0.6              | 30.9            |
| Loratadine                                                                                                                                                            | 5.50                                               | 21.88                       | 2.21 ± 0.31 | 1.51                  | ~ 100.0              | 0.71 ± 0.17 | 3.6              | 14.5            |
| Maprotilene                                                                                                                                                           | 4.37                                               | 27.54                       | 1.86 ± 0.23 | 5.13                  | ~ 100.0              | 1           | 0.9              | 5.4             |
| Mefloquine                                                                                                                                                            | 4.79                                               | 25.12                       | 2.17 ± 0.26 | 2.19                  | ~ 100.0              | 1           | 2.2              | 11.5            |

(Continued)

Supplementary Table S1. (Continued)

| Drugs              | [ <sup>3</sup> H]Dofetilide           | TI <sup>+</sup> Flux Assays |             | APPC Assays           |                      |             | APPC Over (Fold) |                 |
|--------------------|---------------------------------------|-----------------------------|-------------|-----------------------|----------------------|-------------|------------------|-----------------|
|                    | ( <sup>3</sup> H) K <sub>i</sub> (μM) | EC <sub>50</sub> (μM)       | Hill Slope  | EC <sub>50</sub> (μM) | E <sub>max</sub> (%) | Hill Slope  | <sup>3</sup> H   | TI <sup>+</sup> |
| <b>Mibefradil</b>  | 0.95                                  | 6.76                        | 2.48 ± 0.29 | 0.93                  | 99.4 ± 7.5           | 1           | 1.0              | 7.2             |
| Nortriptyline      | 4.79                                  | 29.51                       | 1.57 ± 0.11 | 1.51                  | 85.9 ± 11.3          | 1           | 3.2              | 19.5            |
| Olanzapine         | 6.31                                  | 52.48                       | 1           | 2.34                  | ~ 100.0              | 0.57 ± 0.09 | 2.7              | 22.4            |
| Ouabain            | 17.78                                 | NI                          | NA          | NI                    | NA                   | NA          | NA               | NA              |
| PD-118057          | 12.30                                 | 52.48 <sup>a</sup>          | 1           | Activator             | NA                   | 1           | NA               | NA              |
| Perphenazine       | 1.05                                  | 6.17                        | 1.41 ± 0.17 | 1.15                  | ~ 100.0              | 1           | 0.9              | 5.4             |
| Phenytoin          | 18.20                                 | NI                          | NA          | 0.21                  | 59.8 ± 13.0          | 0.47 ± 0.16 | 85.1             | NA              |
| Pimozide           | 0.023                                 | 1.62                        | 1.40 ± 0.20 | 0.07                  | ~ 100.0              | 1           | 0.3              | 23.4            |
| Propafenone        | 1.82                                  | 3.80                        | 1.92 ± 0.25 | 0.09                  | ~ 100.0              | 1           | 21.4             | 44.7            |
| Pyrilamine         | 5.89                                  | 8.91                        | 1           | 1.95                  | ~ 100.0              | 1           | 3.0              | 4.6             |
| Quetiapine         | 4.47                                  | 11.48                       | 1           | 2.51                  | ~ 100.0              | 1           | 1.8              | 4.6             |
| Quinidine          | 2.75                                  | 6.31                        | 1           | 0.26                  | ~ 100.0              | 0.51 ± 0.16 | 10.5             | 24.0            |
| Risperidone        | 1.00                                  | 1.66                        | 1           | 0.28                  | ~ 100.0              | 1.33 ± 0.23 | 3.6              | 5.9             |
| <b>Sertindole</b>  | 0.13                                  | 3.02                        | 1.74 ± 0.17 | 0.41                  | ~ 100.0              | 1.30 ± 0.25 | 0.3              | 7.4             |
| Tamoxifen          | 0.95                                  | 22.39                       | 1           | 6.76                  | ~ 100.0              | 1           | 0.1              | 3.3             |
| <b>Terfenadine</b> | 0.13                                  | 5.01                        | 1           | 0.13                  | ~ 100.0              | 0.59 ± 0.18 | 1.0              | 37.2            |
| <b>Terodiline</b>  | 2.14                                  | 4.27                        | 1.60 ± 0.11 | 0.32                  | ~ 100.0              | 0.60 ± 0.17 | 6.6              | 13.2            |
| <b>Thioridazin</b> | 1.20                                  | 11.22                       | 2.92 ± 0.70 | 0.51                  | ~ 100.0              | 1           | 2.3              | 21.9            |
| Trifluoperazine    | 0.98                                  | 17.38                       | 2.45 ± 0.17 | 1.55                  | 99.2 ± 6.9           | 1           | 0.6              | 11.2            |
| Venlafaxine        | 16.60                                 | NI                          | NA          | 21.38                 | 95.9 ± 4.2           |             | 0.8              | NA              |
| Verapamil          | 1.55                                  | 2.82                        | 1.78 ± 0.17 | 0.58                  | ~ 100.0              | 1           | 2.7              | 4.9             |
| Way 161503         | 8.13                                  | 44.67                       | 1           | 3.55                  | 97.2 ± 7.3           | 1           | 2.3              | 12.6            |

Values represent average binding affinity (K<sub>i</sub> from binding assays) and potency (EC<sub>50</sub> from TI<sup>+</sup> or APPC assays) taken directly from curve-fittings in Prism. Multiple assays ( $n \geq 2$ ) were normalized to percentage inhibition and pooled for analysis. All [<sup>3</sup>H]dofetilide competition binding curves favored ( $P < 0.05$ ) four-parameter logistic model with Hill slope of 1. For TI<sup>+</sup> flux and APPC assays, if a curve favored ( $P < 0.05$ ) variable slope model, variable slope and corresponding potency values were reported; otherwise, Hill slope of 1 and corresponding potency value were reported. The maximal inhibition in competition binding and TI<sup>+</sup> flux assays were 100% and not listed in the table (see Results for PD-118057 and ciclopirox). The last two columns list potency difference (in fold) between APPC over [<sup>3</sup>H]dofetilide binding assay (<sup>3</sup>H) or TI<sup>+</sup> flux assay. In average, the APPC assay is 16.7-fold more potent than TI<sup>+</sup> assay and 5-fold more potent than the [<sup>3</sup>H]-dofetilide binding assay. Those drug names in bold are the 10 withdrawn drugs from the market since 1990s.

<sup>a</sup>Indicated potencies for hERG activator activity in the TI<sup>+</sup> flux or APPC assay.

APPC, automated planar patch clamp; NI, no inhibition at up to 100 μM; NA, not applicable; hERG, human ether-a-go-go related gene.

**Supplementary Table S2. Chronic Effect of Ouabain and Pentamidine on Human Ether-a-go-go-Related Gene Activity as Determined in Chronic  $\text{TI}^+$  Flux Assays**

| Time (Min)  | Maximum Inhibition (%) | Average $\text{EC}_{50}$ ( $\mu\text{M}$ ) | Hill Slope      |
|-------------|------------------------|--------------------------------------------|-----------------|
| Ouabain     |                        |                                            |                 |
| 15          | 29.3 $\pm$ 2.1         | 1.17                                       | 1               |
| 30          | 35.8 $\pm$ 2.2         | 1.08                                       | 1.87 $\pm$ 0.81 |
| 45          | 55.9 $\pm$ 1.6         | 0.60                                       | 1.46 $\pm$ 0.20 |
| 60          | 70.7 $\pm$ 1.3         | 0.53                                       | 1.28 $\pm$ 0.11 |
| 75          | 88.4 $\pm$ 1.9         | 0.46                                       | 1.19 $\pm$ 0.12 |
| 90          | 99.2 $\pm$ 1.9         | 0.36                                       | 1.64 $\pm$ 0.20 |
| 120         | ~ 100.0                | 0.16                                       | 4.16 $\pm$ 0.43 |
| 180         | ~ 100.0                | 0.11                                       | 4.66 $\pm$ 2.10 |
| 240         | ~ 100.0                | 0.050                                      | 3.43 $\pm$ 0.27 |
| 960 (16 h)  | ~ 100.0                | 0.018                                      | 5.72 $\pm$ 0.48 |
| Pentamidine |                        |                                            |                 |
| 240         | 78.7 $\pm$ 10.3        | 46.79                                      | 1               |
| 480         | ~ 100.0                | 29.22                                      | 1               |
| 960         | ~ 100.0                | 11.17                                      | 1.26 $\pm$ 0.06 |

Cells were first incubated with ouabain or pentamidine for desired time (minutes to hours) at 37°C in cell incubator, washed once with assay buffer, and loaded with  $\text{TI}^+$  flux dye solution for 90 min at room temperature in the dark, and remaining total hERG activity was then determined. Initial slope of the curves was normalized to percentages with buffer control as 0% inhibition and complete inhibition (initial slope of around 2 with 10  $\mu\text{M}$  cisapride) as 100% and pooled for analysis in the Prism with built-in four-parameter logistic function. Figures are presented in *Figure 3*. Potency, Hill slope, and maximum inhibition were reported directly from Prism. While curve-fitting, bottom was constrained to 0%, top was constrained to < 100%, and Hill slope was determined by the built-in comparison function in the Prism. Intracellular (if they entered cells) and residual drugs might be still working after removal of drug solution and during 90 min incubation with  $\text{TI}^+$  flux dye.

**Supplementary Table S3. Protocol Table for the [<sup>3</sup>H]Dofetilide Binding Assay (96-Well Format)**

| Step | Parameter                               | Value   | Description                                |
|------|-----------------------------------------|---------|--------------------------------------------|
| 1    | Fresh binding buffer                    | pH 7.40 | Make fresh binding buffer, 25 mL per plate |
| 2    | [ <sup>3</sup> H]dofetilide             | 50 µL   | Working stock at 5×final of 1.5nM          |
| 3    | Samples, Dofetilide as positive control | 50 µL   | Working stock at 5×, 11 concentrations     |
| 4    | Total binding                           | 50 µL   | Binding buffer in the column 1             |
| 5    | Membrane homogenates                    | 150 µL  | Made from hERG HEK 293 cells               |
| 6    | Incubation                              | 1 h     | At room temperature in the dark            |
| 7    | Filtration and wash                     | 3 times | With ice cold buffer                       |
| 8    | Dry filter paper                        | 1 min   | Remove water                               |
| 9    | Apply scintillation cocktail            | 1 min   | Melt a sheet of cocktail on a hot plate    |
| 10   | Count radioactivity                     | 5 min   | 1450 MicroBeta Trilux plate counter        |

**Step Notes**

1. (mM) 135 NaCl, 5 KCl, 0.8 MgCl<sub>2</sub>, 10 HEPES, 10 Glucose, 1 EGTA, 0.01% BSA, pH 7.40.
2. Prepare and aliquot 50 µL of 7.5 nM [<sup>3</sup>H]dofetilide to all wells.
3. Row A and B are for positive control with dofetilide; row C to E for one test compound; row F to H for another test compound. Low to high concentrations in columns 2–12, correspondingly.
4. Column 1 contains no drug for total binding with buffer.
5. Homogenize membrane pellets by forcing through a 26-gauge needle several times.
7. Washing buffer: 50 mM Tris-HCl, 10 mM MgCl<sub>2</sub>, 0.1 mM EDTA, pH 7.40, 4°C.
9. Meltilex scintillant (PerkinElmer Life and Analytic Sciences) was applied to the dried filter on a hot plate.
10. Radio activity was counted for 5 min/well on PerkinElmer 1450 MicroBeta Trilux plate counter.

**Supplementary Table S4. Protocol Table for the  $Tl^{+}$  Flux Assay (384-Well Format)**

| Step | Parameter                         | Value        | Description                              |
|------|-----------------------------------|--------------|------------------------------------------|
| 1    | Coat 384-well plates with PLL     | 20 min       | 30 $\mu$ L/well PLL at 50 $\mu$ g/mL     |
| 2    | Plate cells, hERG HEK 293 cells   | 40 $\mu$ L   | 25,000 cells per well                    |
| 3a   | Load FluxOR reagent for 90 min    | 20 $\mu$ L   | Only for acute $Tl^{+}$ flux assays      |
| 4a   | Incubate with drug, go to Step 6  | 25 $\mu$ L   | Only for acute $Tl^{+}$ flux assays      |
| 3b   | Incubate with drug                | Overnight    | Only for chronic $Tl^{+}$ flux assays    |
| 4b   | Load FluxOR reagent for 90 min    | 20 $\mu$ L   | Only for chronic $Tl^{+}$ flux assays    |
| 5b   | Remove drugs and add assay buffer | 25 $\mu$ L   | Only for chronic $Tl^{+}$ flux assays    |
| 6    | Add stimulation buffer with FLIPR | 6.25 $\mu$ L | For both acute & chronic $Tl^{+}$ assays |
| 7    | Assay readout                     | 490/525 nm   | Fluorescence was read with FLIPR         |

**Step Notes**

1. Assay buffer: 1  $\times$  Hank's balanced salt solution, 20 mM HEPES, 2.5 mM Probenecid, pH 7.40
2. FluxOR™ Thallium potassium ion channel assay kit F10017 from Invitrogen
  1. Coat black clear-bottom 384-well plate with Poly-L-Lys for minimum of 20 min, and wash with  $H_2O$ .
  2. Cells were plated in Dulbecco's modified Eagle's medium + 5% fetal bovine serum without G418 for overnight. Cryopreserved cells could also be used for acute  $Tl^{+}$  flux assays at about 5 h after plating.
- 3a and 4b. Cells were incubated with FluxOR reagent at room temperature for 90 min in the dark.

To make fresh FluxOR reagent working solution, dilute the FluxOR reagent stock (Component A) at 1:1,000 and PowerLoad (Component C) at 1:100 with assay buffer.
- 4a. Drugs were tested at 10  $\mu$ M in quadruplicate set for primary screening and 16-points for dose-response assays. Positive control Cisapride was included. Drug working solutions were prepared in assay buffer. Cells were incubated with drugs for 15 min.
- 3b. Drugs were tested at 10  $\mu$ M in quadruplicate set for primary screening and 16-points for dose-response. Positive control ouabain was included. Drug working solutions were prepared in assay buffer. Cells were incubated with drugs overnight or variable incubation times.
- 4b. Remove drug/media and quick wash with assay buffer, then load cells with  $Tl^{+}$  dye for 90 min at room temperature in the dark.
- 5b. Another positive control cisapride was added at this step; incubate for 15 min.
6. Stimulation buffer (5 mL total): 2.5 mL deionized water + 1 mL FluxOR chloride-free buffer (5 $\times$ , Component E) + 1 mL  $K_2SO_4$  stock (125 mM, Component F) + 0.5 mL  $Tl_2SO_4$  (50 mM, Component G). The potassium ion concentration is 50 mM and the  $Tl^{+}$  ion concentration is 10 mM in the stimulation buffer.
7. FLIPR recorded 10 readings (one reading per second) before addition and continued to read for another 90 s. Initial slope of curve (initial 15 s at the rising phase of fluorescence intensity readings) was exported for data processing.

**Supplementary Table S5. Protocol Table for the Automated Planar Patch Clamp Assay**

| Step | Parameter                                 | Value                 | Description                                        |
|------|-------------------------------------------|-----------------------|----------------------------------------------------|
| 1    | Subculture hERG HEK 293 cells             |                       | 2 days in advance                                  |
| 2    | Prepare External & Internal solutions     | 60 min                | Osmolarity: 28–300 mmol/kg                         |
| 3    | Prime PatchXpress system                  | 17 min                | With fresh solutions                               |
| 4    | Prepare cells for PatchXpress             | 35 min                | 2.5 mL/10-cm dish Accutase, recovery               |
| 5    | Prepare drug solutions (360 $\mu$ L/well) | 15 min                | In 96-well plate                                   |
| 6    | Load SealChip and Start procedure         | 7 min                 | Before the system asking for cells                 |
| 7    | Pellet cells for PatchXpress              | 3 min                 | 250 $\times$ g at room temperature                 |
| 8    | Load cells to the PatchXpress             | 150 $\mu$ L           | About 1 million cells in External buffer           |
| 9    | Aliquot cells                             | 3.5 $\mu$ L           | 20,000 cells in 3.5 $\mu$ L/chamber                |
| 10   | Detect cells                              | 2 min                 | Cells descending to holes                          |
| 11   | Seals and whole-cell configuration        | 5 min                 | Giga seals and 2 <sup>nd</sup> seals               |
| 12   | Start voltage protocol from HP – 80 mV    | 0.1 Hz                | – 50 mV (50 ms), + 20 mV (5 s), – 50 mV (1.7 s)    |
| 13   | Stabilize                                 | 8 min                 | Terminated for seals with < 0.2 nA                 |
| 14   | Obtain peak tail current                  |                       | With buffer, as a control                          |
| 15   | Add drug at 25 $\mu$ L/s                  | 3 $\times$ 50 $\mu$ L | 11 <sup>o</sup> s apart between addition, 7 points |
| 16   | Washout                                   | 7 min                 | With External buffer to reveal recovery            |

**Step Notes**

- hERG HEK 293 cells were subcultured in growth media without G418 for 2 days before use, should not overgrow > 80%.
- Solutions were vacuum filtered to remove bubbles and small particles before use. External buffer: (mM) 137 NaCl, 4 KCl, 1.8 CaCl<sub>2</sub>, 1 MgCl<sub>2</sub>, 10 HEPES, 10 Glucose, pH 7.4. Internal buffer: (mM) 15 NaCl, 70 KF, 60 KCl, 1 MgCl<sub>2</sub>, 5 HEPES, 5 EGTA, 4 ATP, 0.4 GTP pH 7.2
- While the PatchXpress system is being primed, start Step 4.
- Detach cells with Accutase (2.5 mL/10-cm dish for 4 min) at room temperature, transfer into a 50 mL tube in total 20 mL media, and sit the tube in incubator for 30 min with loose cap.
- Prepare drug working solutions with External buffer while cells were incubated (Step 4).
- At the end of 30-min incubation (Step 4), load a SealChip and start procedure.
- While the SealChip is being prepared for recording (Step), pellet 1 million cells in a new 50 mL tube by centrifugation at 250 $\times$ g for 2.5 min at room temperature
- When the SealChip is ready from Step 6, the system asks for cells.
- The PatchXpress takes over from here and execute procedures automatically according to user-defined patch clamping protocols. Robot pipette aliquots 3.5  $\mu$ L cell suspension into each chamber of the SealChip.
- Chambers with low seal resistance (<100 M $\Omega$ ) were terminated; chambers with  $\geq$  200 M $\Omega$  would enter Step 11. User can choose to terminate troubled chambers.
- Form seals and obtain whole-cell configuration, Giga seals for seal resistance (R<sub>seal</sub>) > 1G $\Omega$  and 2<sup>nd</sup> seals for R<sub>seal</sub> > 200 M $\Omega$ .
- Voltage protocol: holding potential at –80 mV, depolarization to –50 mV for 50 ms for leaking current, depolarization + 20 mV for 5 s to activate hERG channels, repolarization to –50 mV for 1.7 s to remove inactivation and elicit hERG tail current, repolarization back to holding potential –80 mV. The protocol was executed continuously every 10 s until the end of Step 16.
- After obtaining whole-cell configuration, cells were maintained for 5 min to reach stable state. At the end of this stage, cells with <0.2nA peak tail current were terminated.
- Apply control (buffer) and obtain peak tail current as 100% hERG activity.
- Apply 7-point drug dose–response, triple addition (3  $\times$  50  $\mu$ L) for each concentration point, 11 s apart between each addition, 5 min maximal between two concentrations.
